# Supplementary material for: Characterization and Digital Restauration of XIV-XV Centuries Written Parchments by Means of Nondestructive Techniques: Three Case Studies
Source: Hindawi journal article supplement (doi:10.1155/2018/2081548), 2018-08-05
Supplement: f1 [file 2081548.f1.docx]

# Journal of Spectroscopy

# Supplementary Materials

# Characterization and digital restauration of XIV-XV centuries written parchments by means of non-destructive techniques. Three case studies.

L. Pronti,1 M. Perino,2 M. Cursi,2 M. L. Santarelli,3 A. C. Felici,1 and M. P. Bracciale3

1 Department of Basic and Applied Sciences for Engineering-Laboratory of Non Destructive Analysis and Archaeometry (LANDA), University of Rome Sapienza, Rome 00161, Italy.
2 Department of History, Cultures and Religions, University of Rome Sapienza, Rome 00185, Italy.

3 Department of Chemical Engineering Materials and Environment and CISTeC- Research Center in Science and Technology for the Preservation of Historical-architectural Heritage, University of Rome Sapienza, Rome 00184, Italy.

Correspondence should be addressed to L. Pronti; lucilla.pronti@uniroma1.it


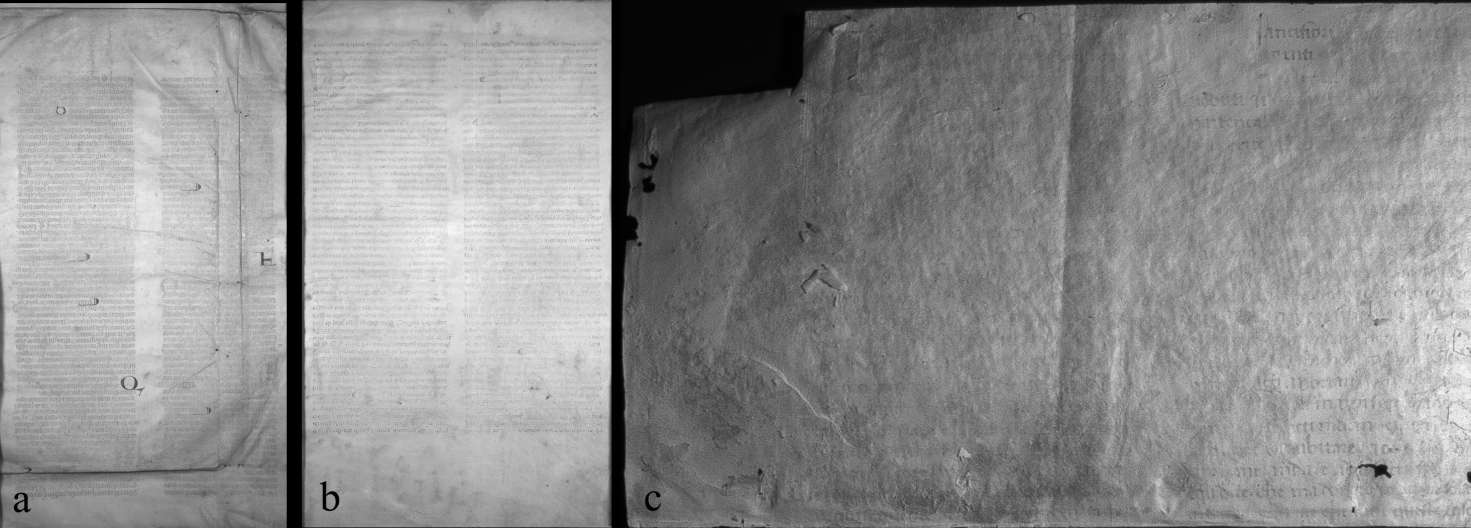


**Fig. S1.** Images taken at 1000 nm on parts of Parch. 34 (a), Parch.37 (b) and Parch. 38 (c).





**Fig. S2.** Reflectance spectrum of the red ink on the Parch. 38.


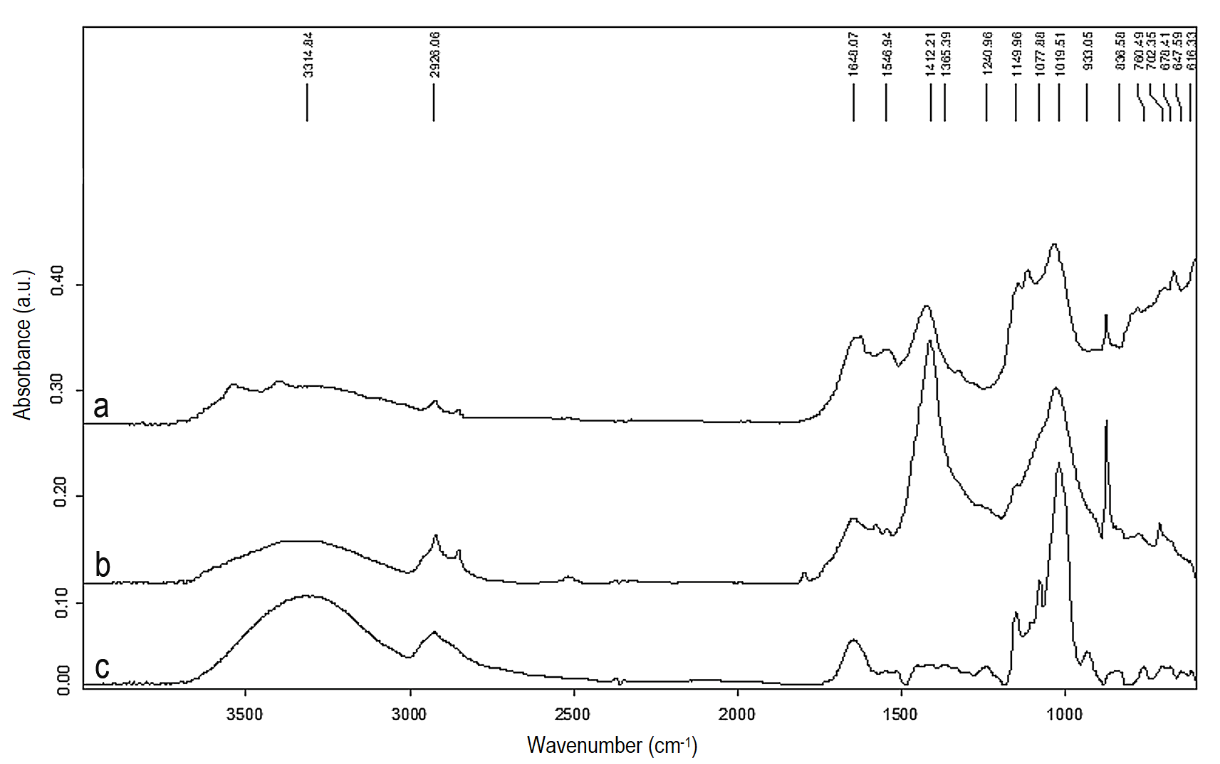


**Fig. S3**. ATR-FTIR spectra of the red ink of the Parch. 34 (a), Parch. 37 (b) and Parch. 38 (c).


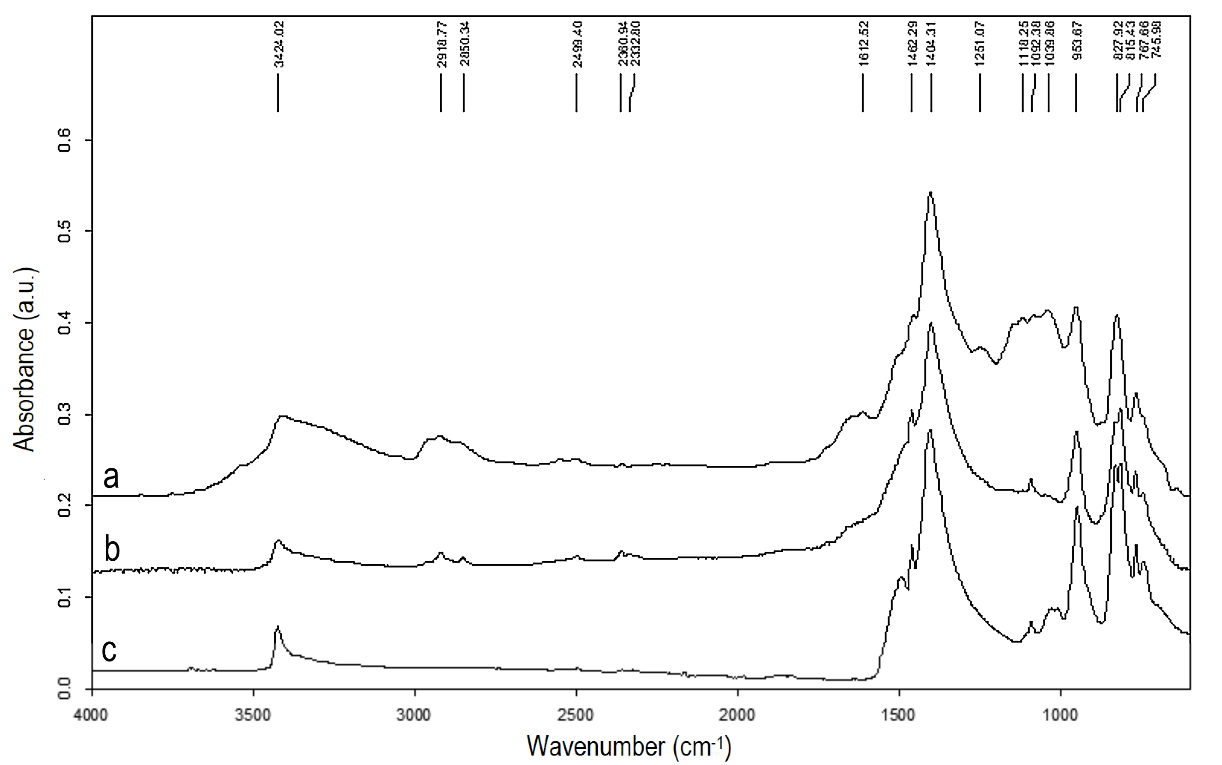


**Fig.S4.** ATR-FTIR spectra of the blue ink of the Parch. 34 (a), Parch. 38 (b) and Azurite pigment for reference (c).

**

**

**Fig. S5.** Reflectance spectrum of the blue ink of the Parch. 34.


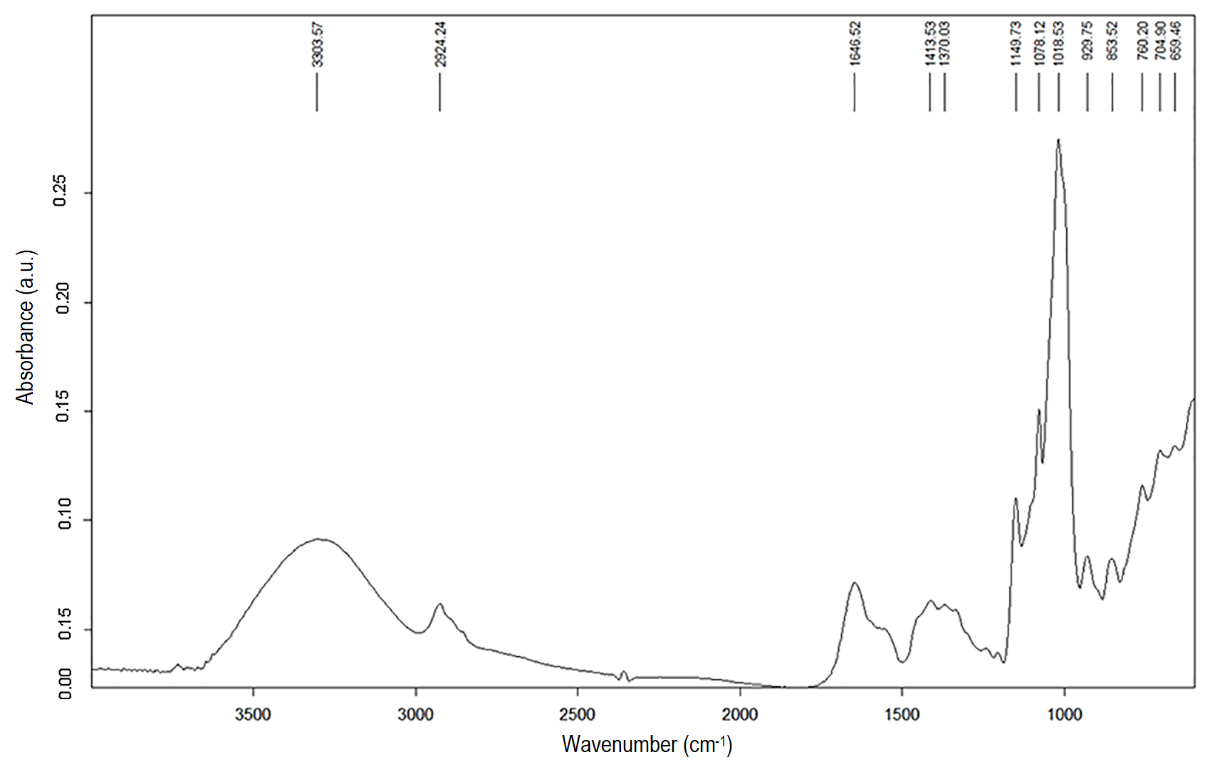


**Fig. S6.** ATR-FTIR spectrum of the violet ink of the Parch. 38.
